# Supplementary material for: Guiding uniform Zn electrodeposition through regulating pressure for stable aqueous Zn batteries
Source: Royal Society of Chemistry journal article supplement (doi:10.1039/d3ta07523k), 2024-01-01
Supplement: d3ta07523k1.pdf [file d3ta07523k1.pdf]

## Supporting Information

### Guiding Uniform Zn Electrodeposition through Regulating Pressure for Stable Aqueous Zn Batteries

Fenglin Zhang,<sup>a</sup> Ziyang Cai,<sup>a</sup> Runtao Liu,<sup>b</sup> Yang Sun<sup>b</sup> and Huilin Pan<sup>ac\*</sup>

a. Department of Chemistry, Zhejiang University, Hangzhou 310027, P. R. China

b. School of Materials Science and Engineering, Sun Yat-sen University, Guangzhou  
510006, China.

c. State Key Laboratory of Clean Energy Utilization, Zhejiang University, Hangzhou  
310027, P. R. China

\*Corresponding authors: Huilin Pan ([panhuilin@zju.edu.cn](mailto:panhuilin@zju.edu.cn))

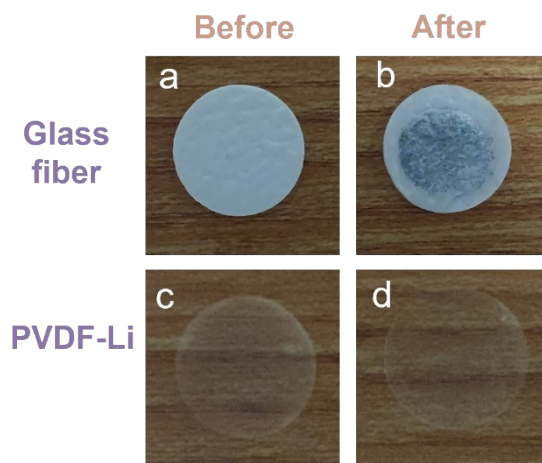

**Fig. S1.** Optical photograph of (a-b) Glass fiber and (c-d) PVDF-Li separators before and after 10 cycles under the pressure of 600 kPa, respectively

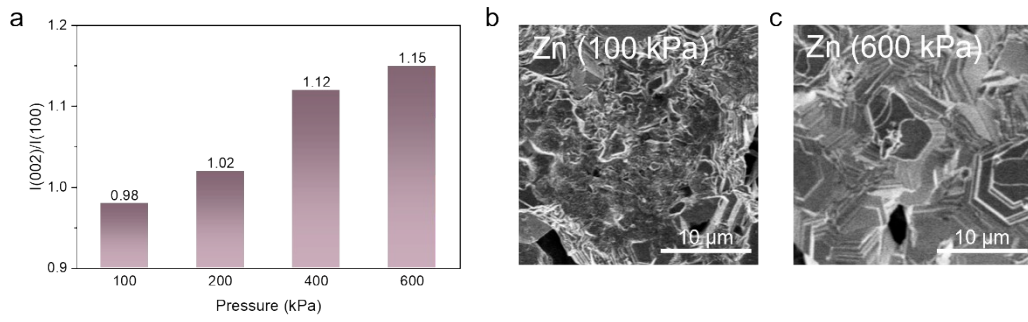

**Fig. S2.** (a)  $I_{(002)}/I_{(100)}$  peak intensity of Zn anodes under different stack pressures after 10 cycles. SEM images of Zn anodes under (b) 100 kPa and (c) 600 kPa after 50 cycles.

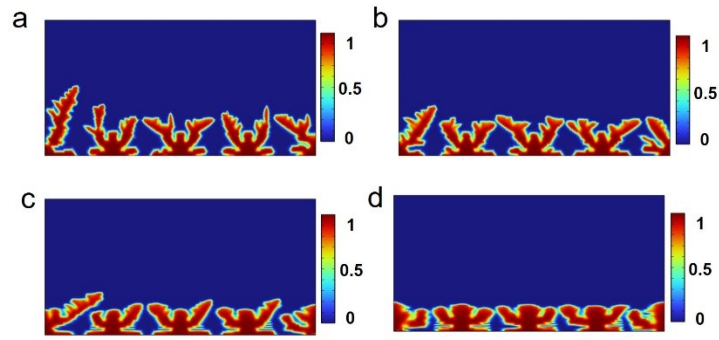

**Fig. S3.** The morphology of the Zn dendrites after growth time of 5 seconds under the pressure of (a) 100 kPa, (b) 200 kPa, (c) 400 kPa and (d) 600 kPa respectively. The colour bar represents the value of the phase-field variable  $\xi$ .

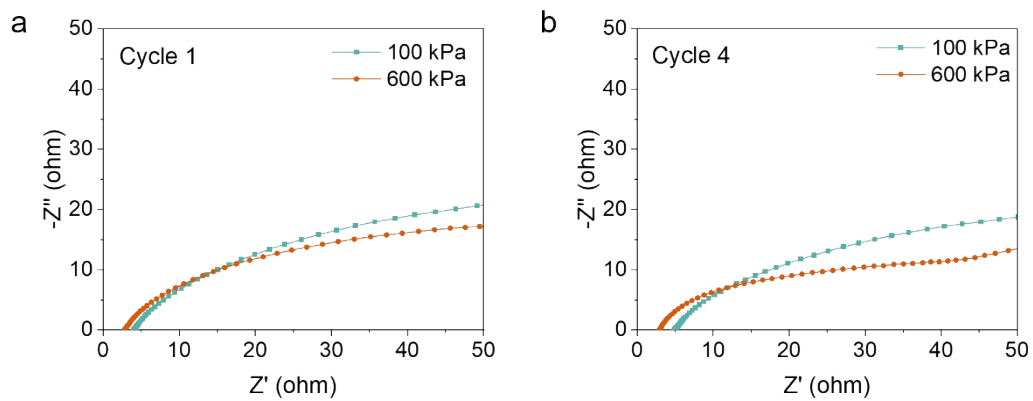

**Fig. S4.** Nyquist curves for the Zn-Zn cells after (a) 1 cycle and (b) 4 cycles under relatively low and high stack pressures.

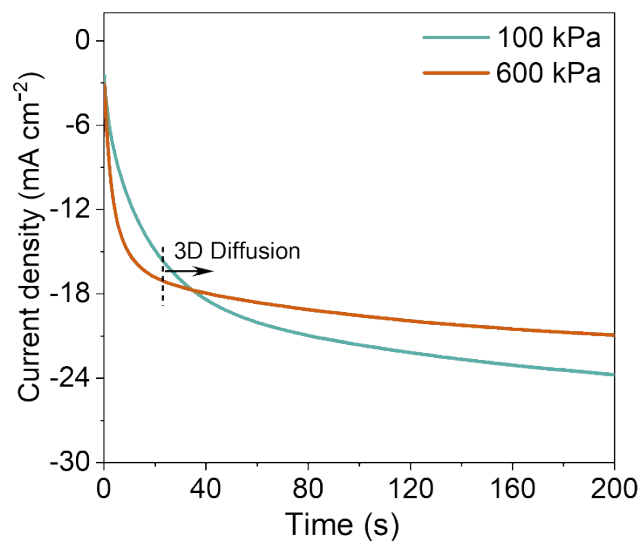

**Fig. S5.** Chronoamperometry tests for Zn deposition behavior at a constant overpotential of -150 mV under 100 kPa and 600 kPa.
